# Supplementary material
Source: PubMed Central journal article supplement (PMC10477957)

# Figure S6

Drug Dosage Curves

# Canertinib

— Veh — 500nM — 1uM — 1.25uM — 1.5uM — 1.75uM — 2uM — 2.5uM

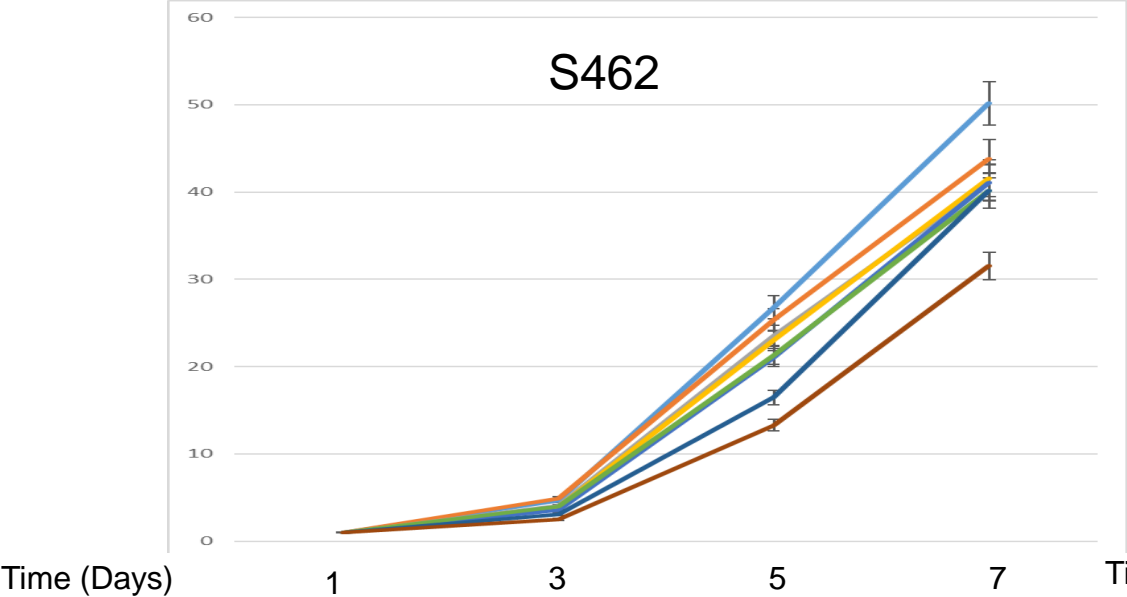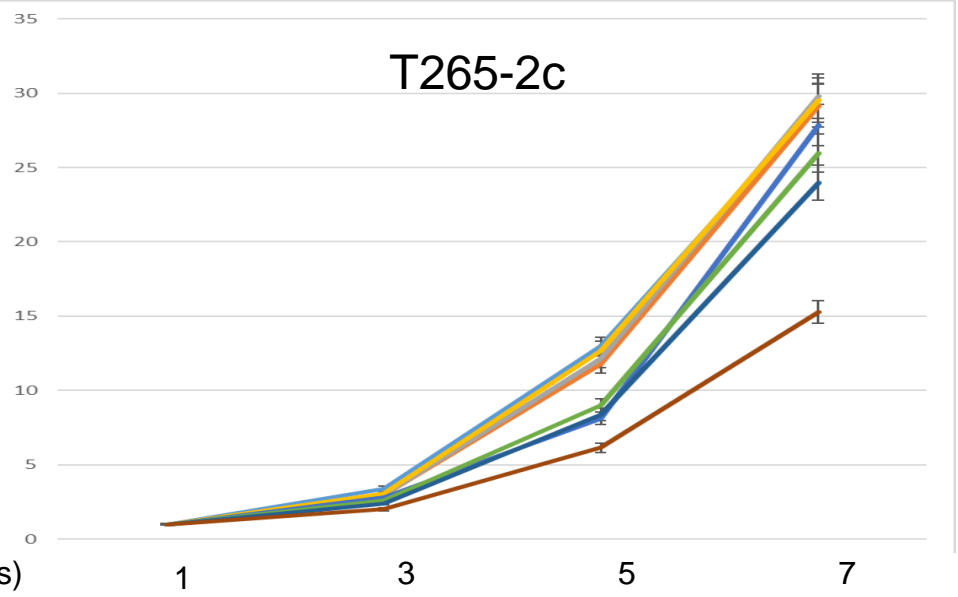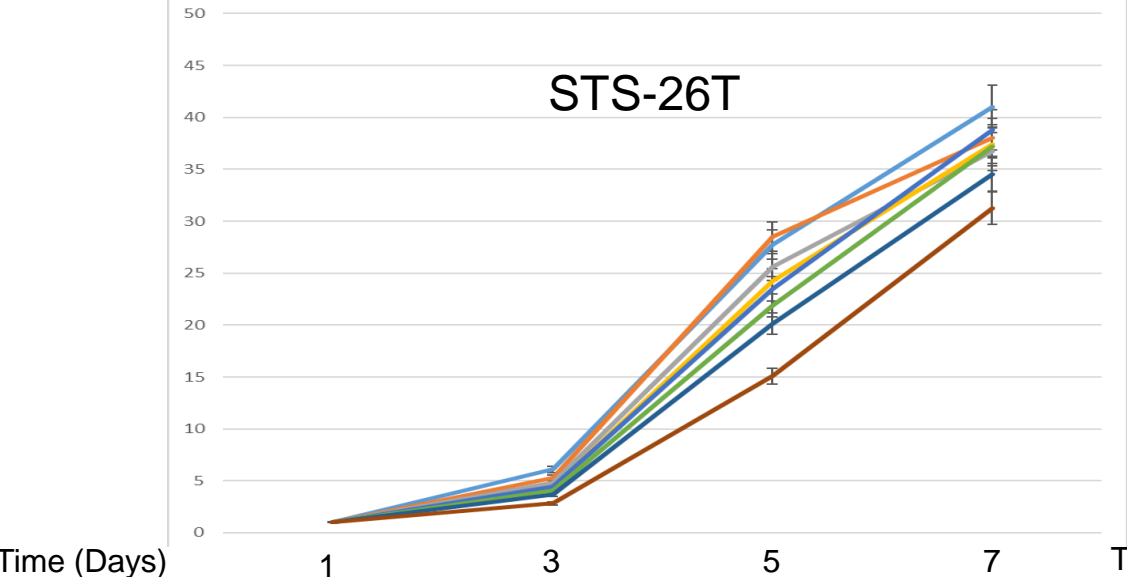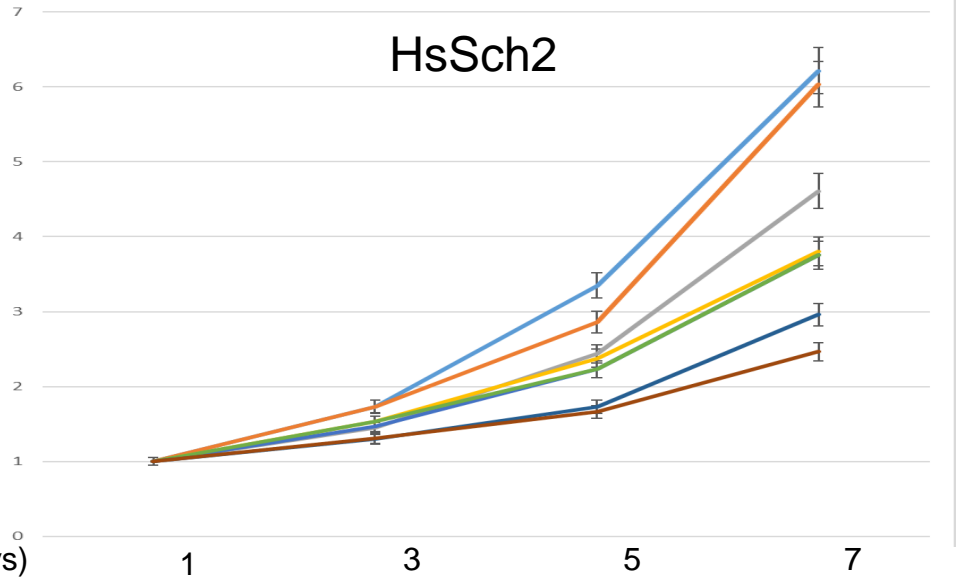

# Sapitinib

— Veh — 500nM — 1uM — 2.5uM — 5uM — 7.5uM — 10uM — 15uM

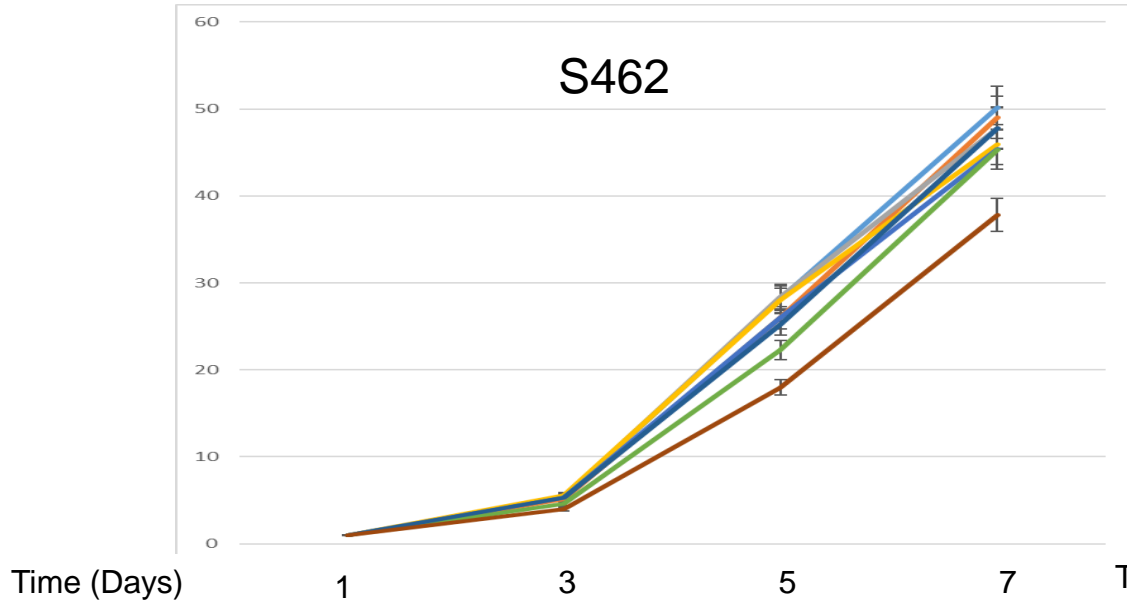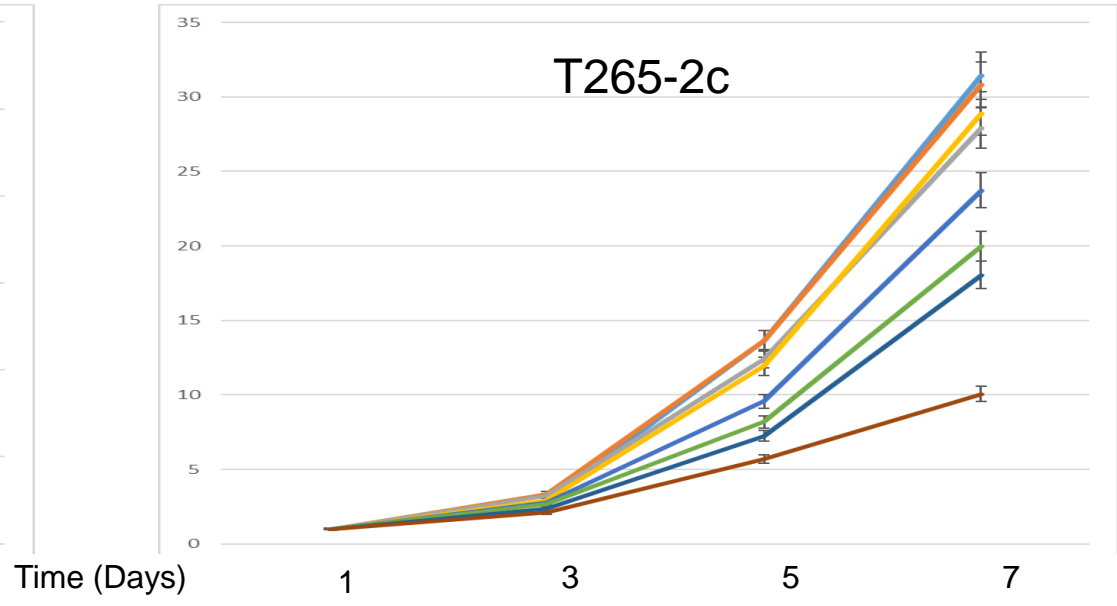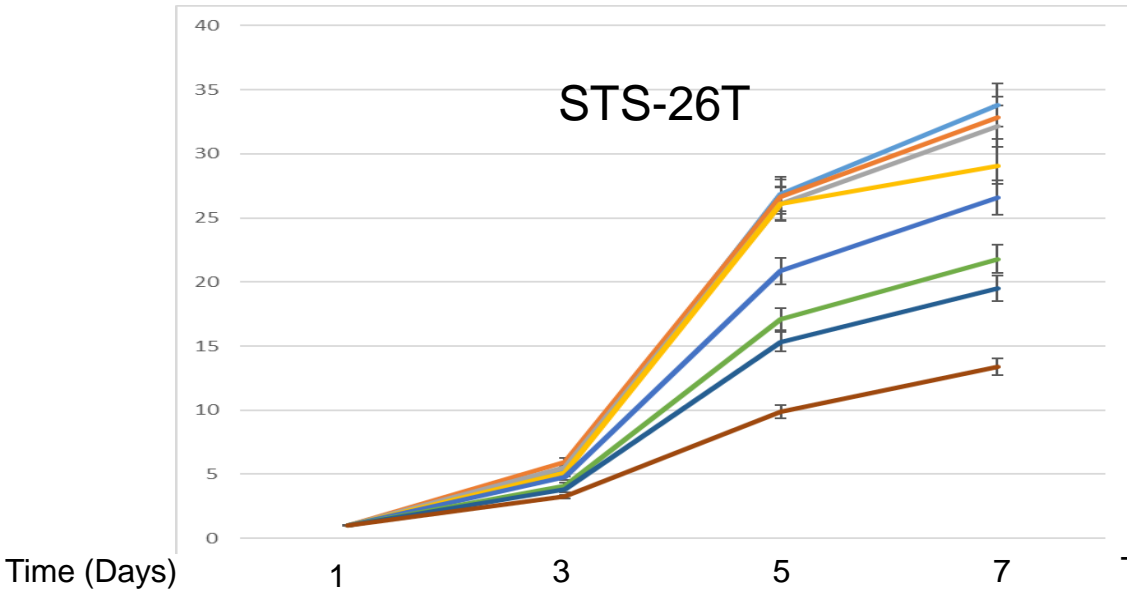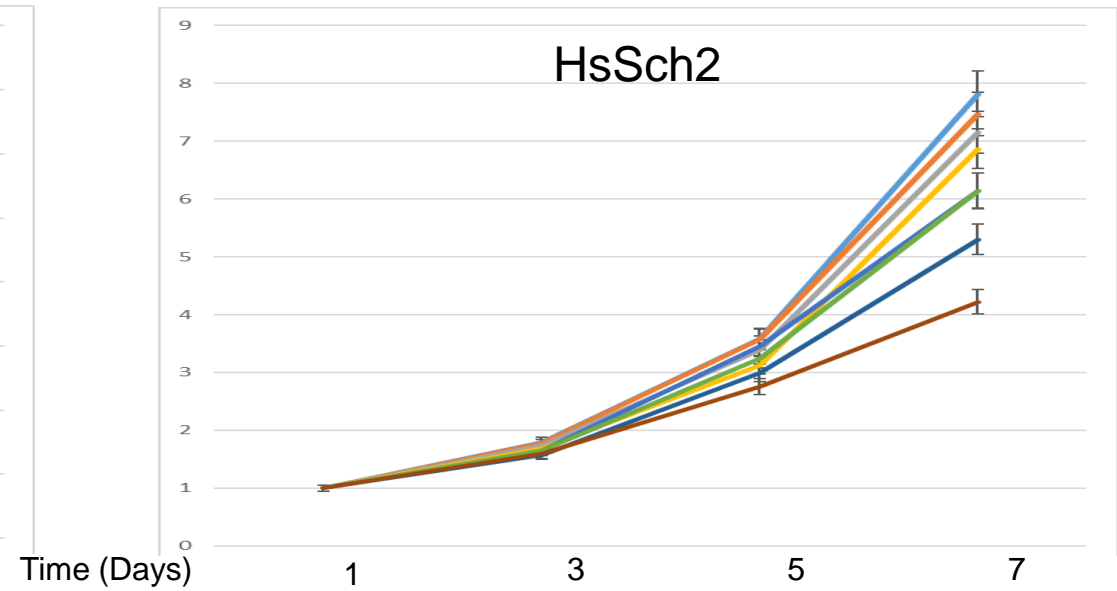

# Trifluoperazine

— Veh — 1uM — 2.5uM — 5uM — 7.5uM — 10uM — 12.5uM — 15uM

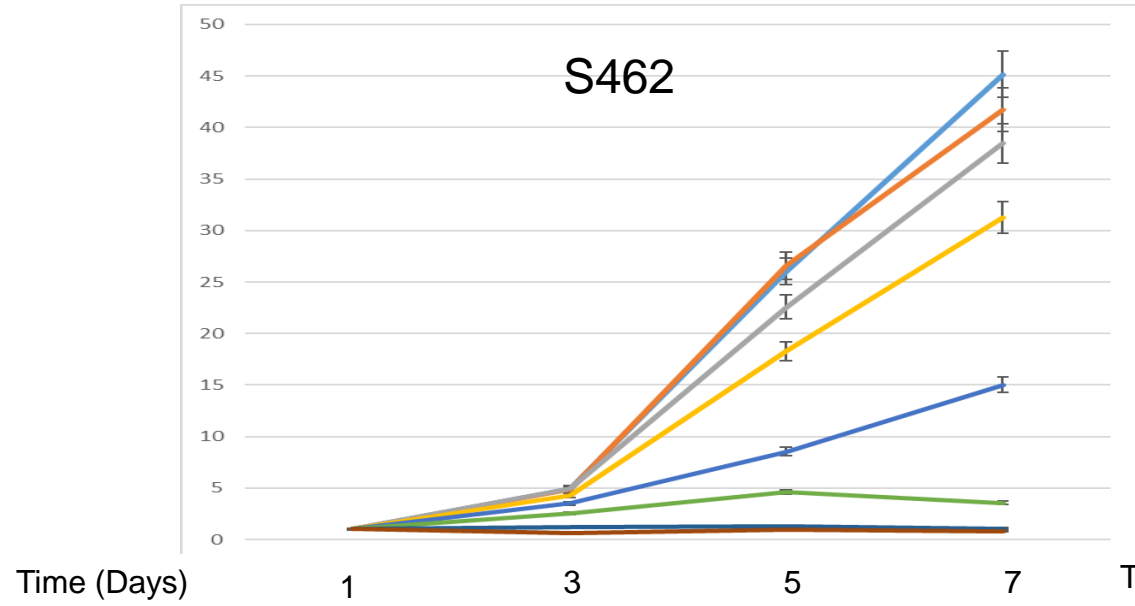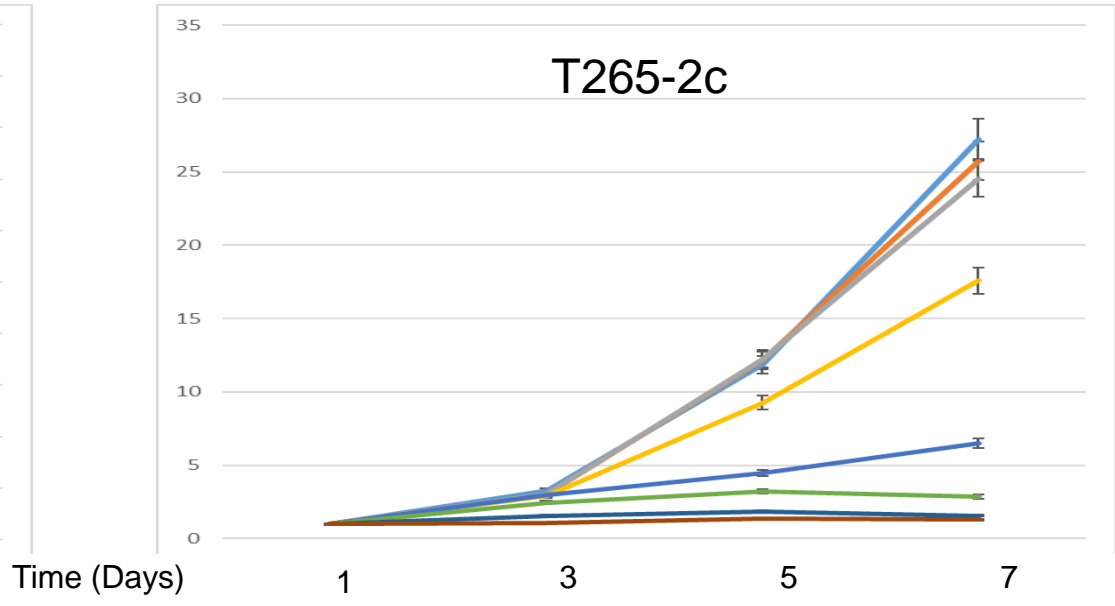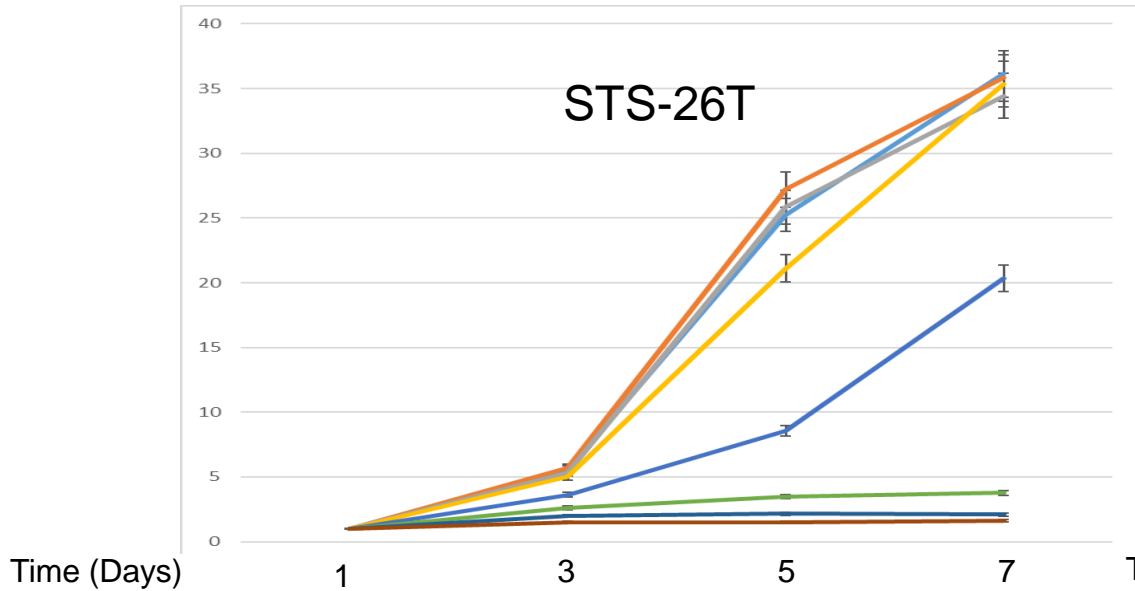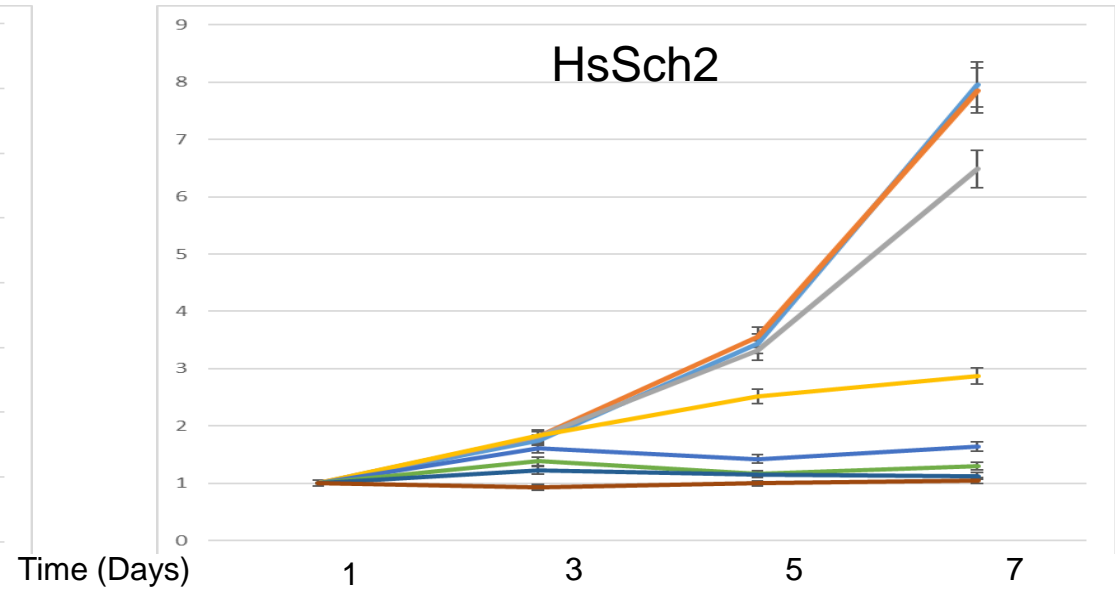

# AZD1208

Veh 500nM 1uM 5uM 10uM 15uM 20uM

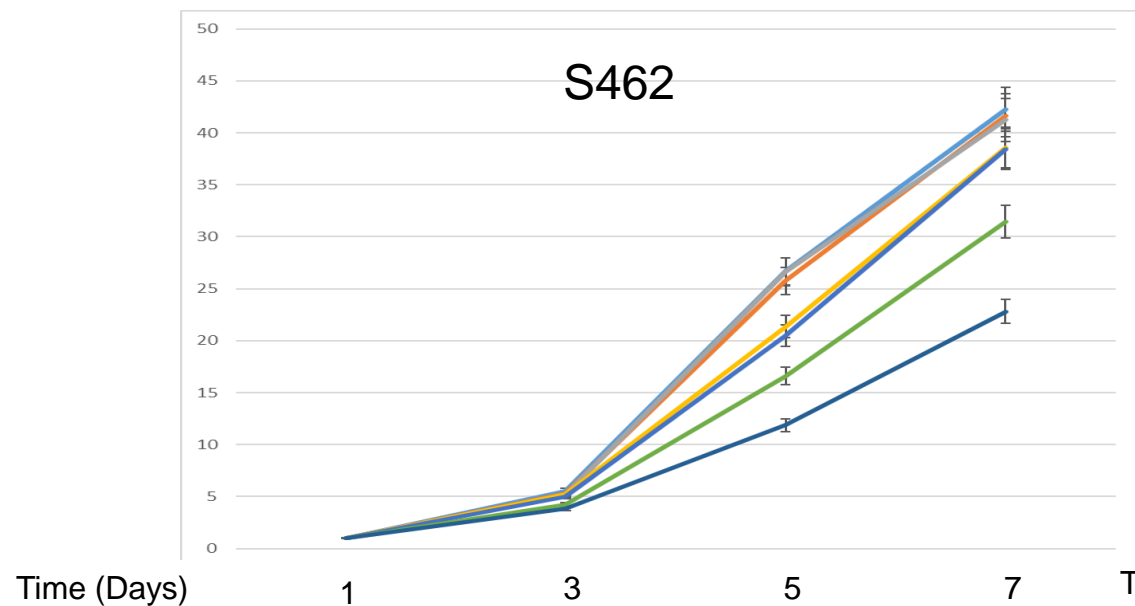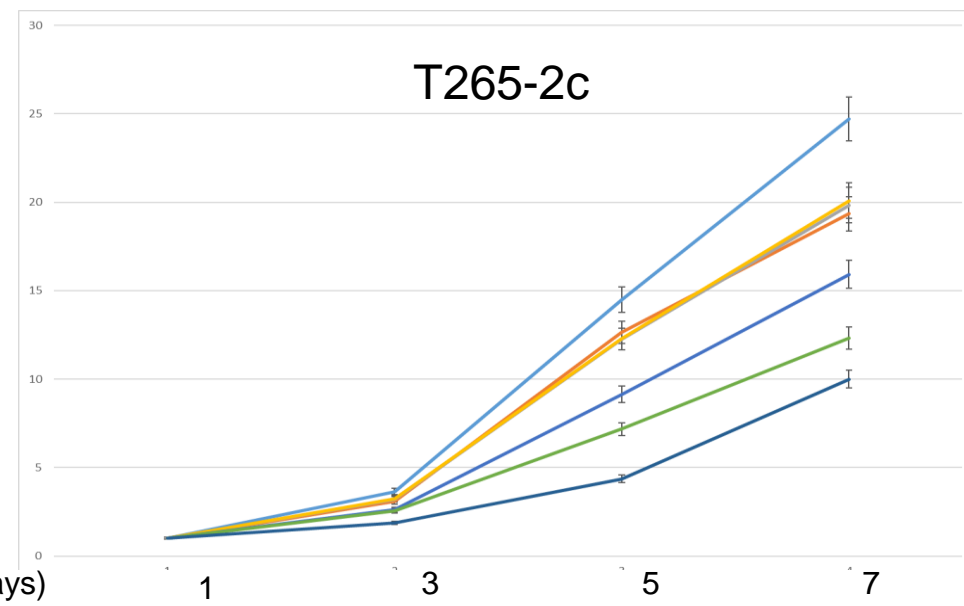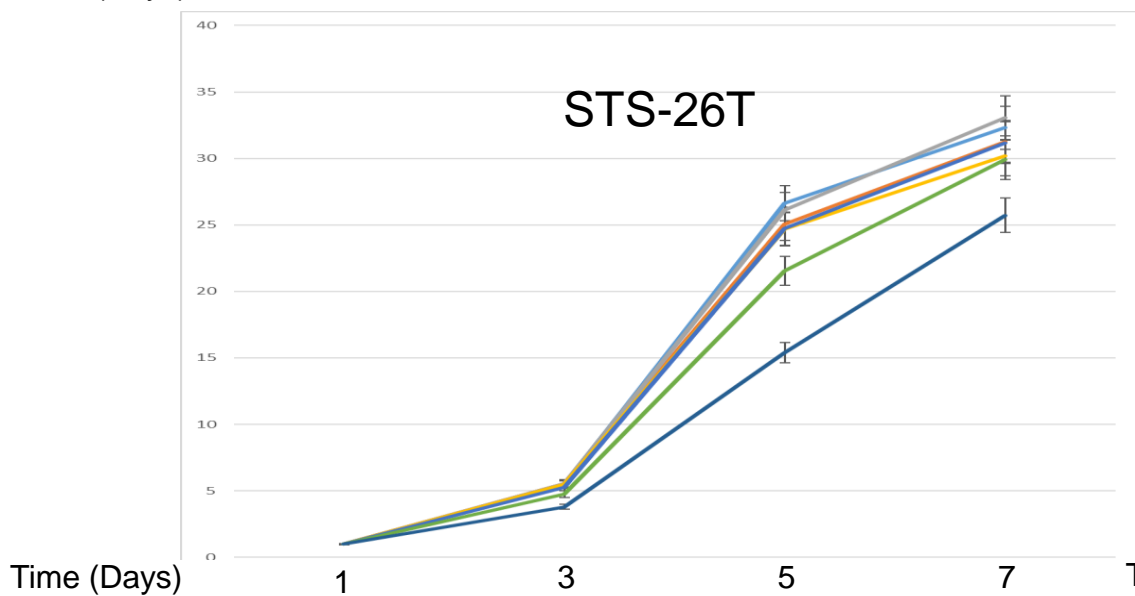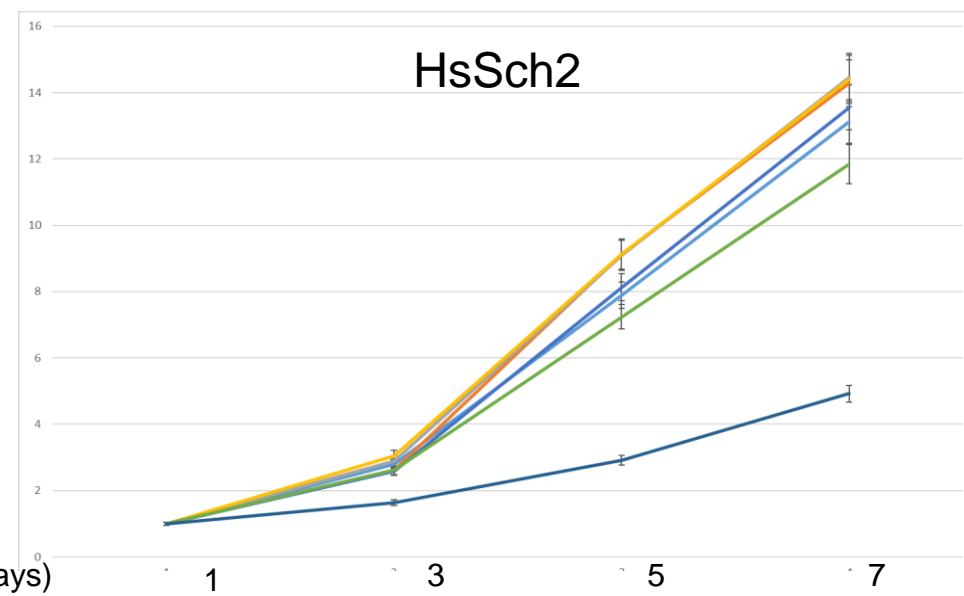

# Saracatinib

Veh 500nM 1uM 2.5uM 5uM 10uM 15uM 20uM

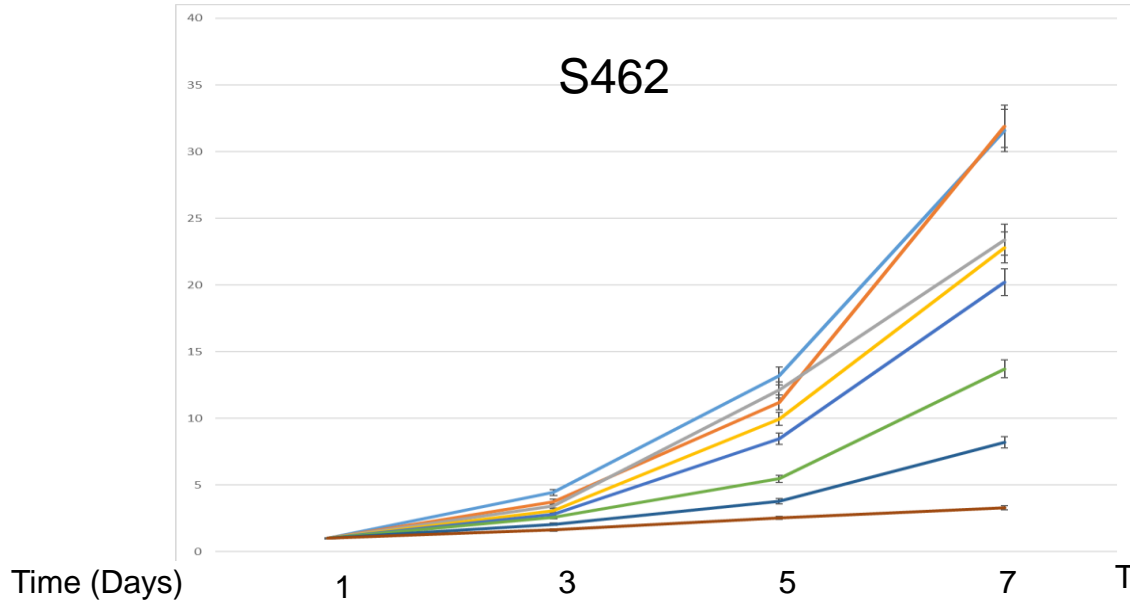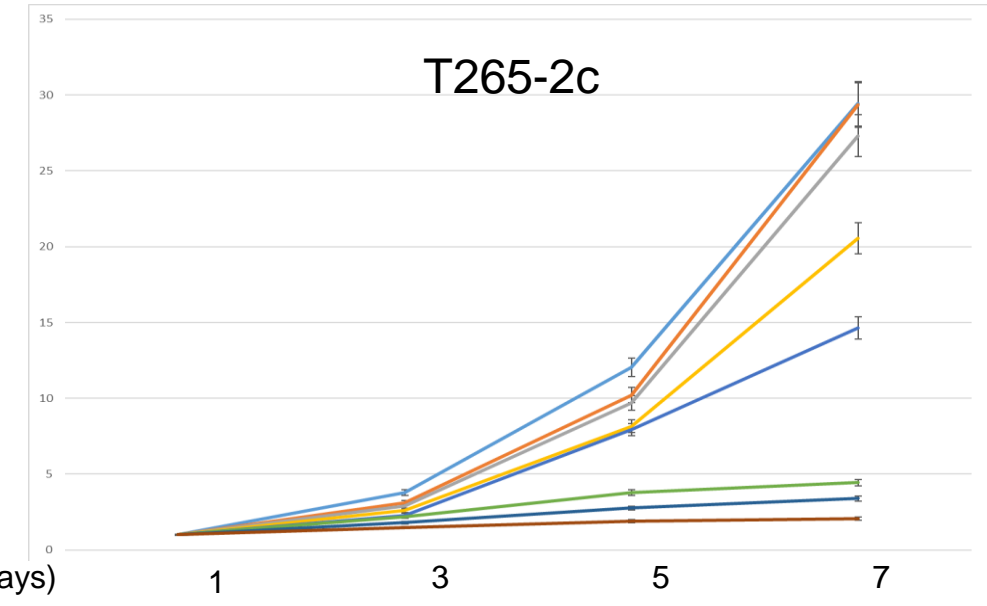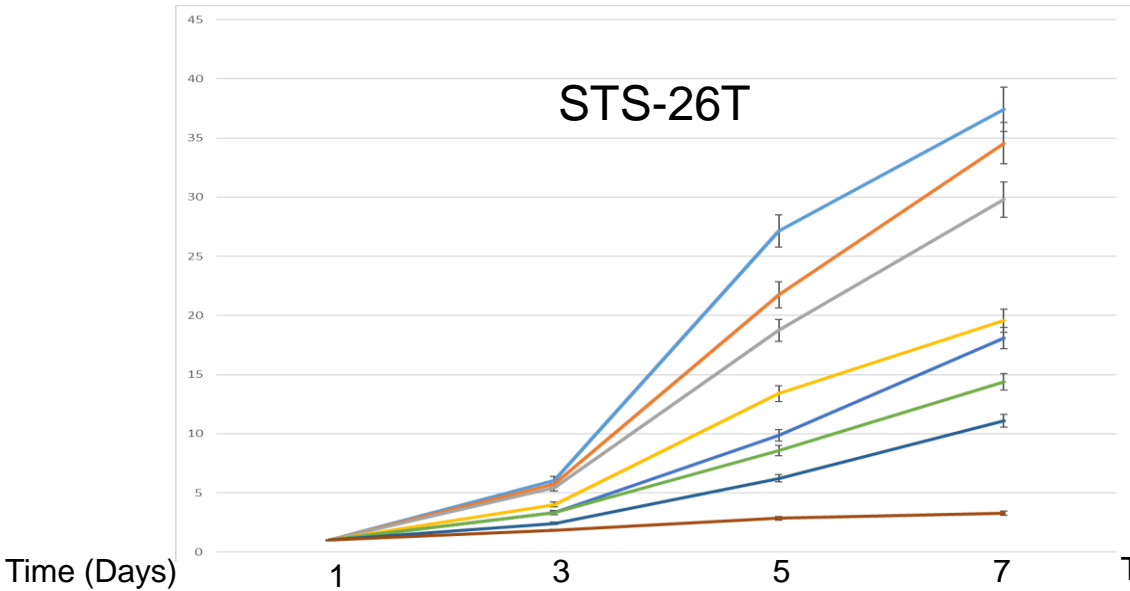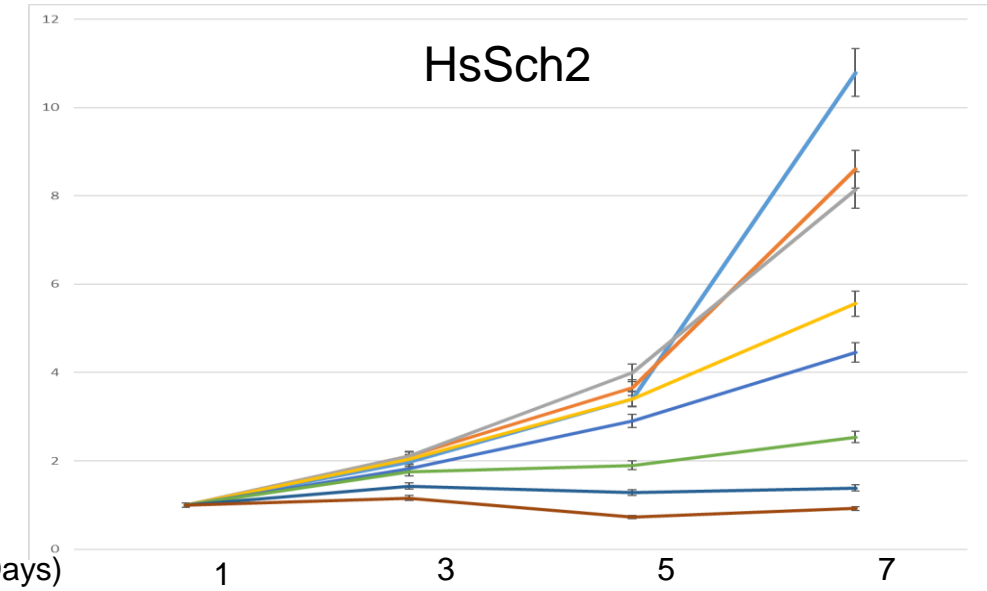

Supplement: mmc1.pdf [file mmc1.pdf]
